# Supplementary material for: Photoluminescence study of perovskite materials derived from tungsten- and lanthanide-containing aurivillius layered perovskite, Bi2Na0.63Ln0.37Ta1.75W0.25O9
Source: Royal Society of Chemistry journal article supplement (doi:10.1039/d4tc02269f), 2024-01-01
Supplement: d4tc02269f1.pdf [file d4tc02269f1.pdf]

### Supplementary Information

## Photoluminescence Study over Perovskite Materials Derived from Tungsten- and Lanthanide-Containing Aurivillius Layered Perovskite, $\text{Bi}_2\text{Na}_{0.63}\text{Ln}_{0.37}\text{Ta}_{1.75}\text{W}_{0.25}\text{O}_9$ .

Keisuke Awaya,<sup>\*a</sup> Ayaka Yamamoto,<sup>b</sup> Kazuto Hatakeyama,<sup>c</sup> and Shintaro Ida<sup>\*c</sup>

a) Faculty of Advanced Science and Technology, Kumamoto University, 2-39-1, Kurokami, Chuo-ku, Kumamoto, 860-8555, Japan.

b) Graduate School of Science and Technology, Kumamoto University, 2-39-1, Kurokami, Chuo-ku, Kumamoto, 860-8555, Japan.

c) Institute of Industrial Nanomaterials (IINa), Kumamoto University, 2-39-1, Kurokami, Chuo-ku, Kumamoto, 860-8555, Japan.

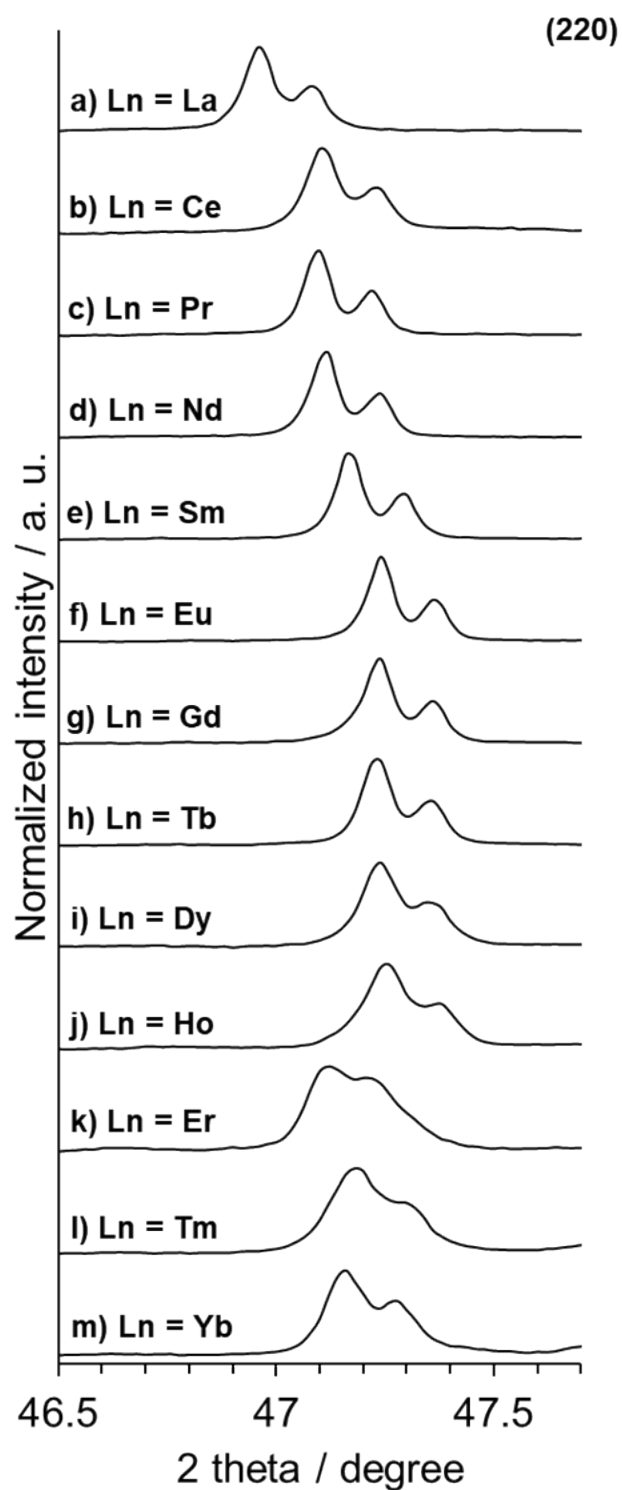

**Figure S1.** XRD pattern ( $2\theta/\theta$  scan,  $2\theta = 46.5\text{-}47.7$  degrees) of  $\text{Bi}_2\text{Na}_{0.63}\text{Ln}_{0.37}\text{Ta}_{1.75}\text{W}_{0.25}\text{O}_9$ . Ln = (a) La, (b) Ce, (c) Pr, (d) Nd, (e) Sm, (f) Eu, (g) Gd, (h) Tb, (i) Dy, (j) Ho, (k) Er, (l) Tm, (m) Yb.

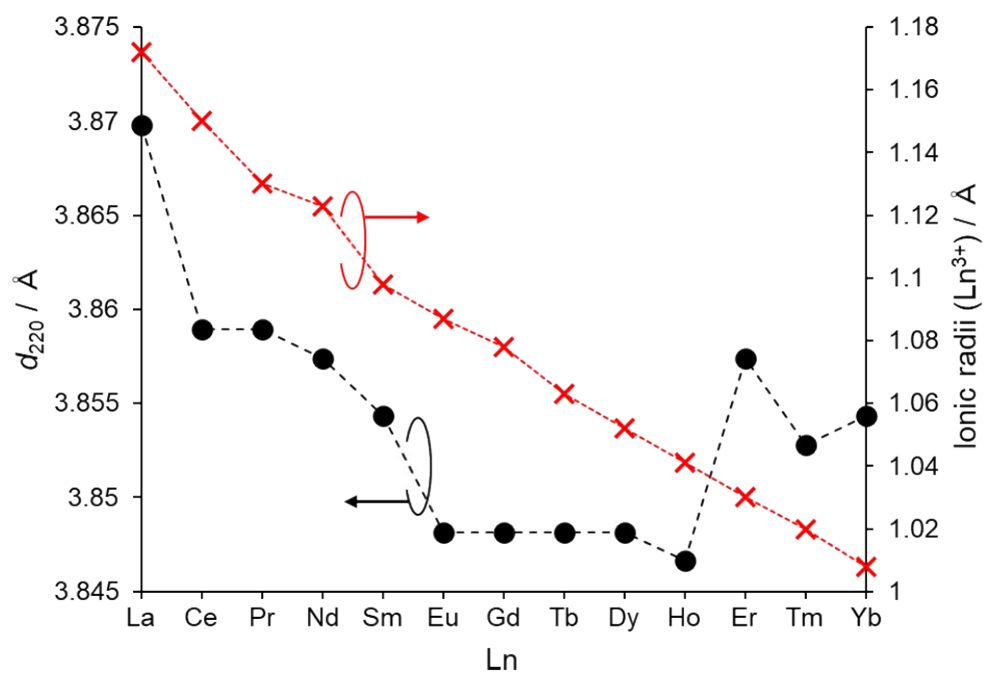

**Figure S2.**  $d$ -spacing values and ionic radii ( $\text{Ln}^{3+}$ ) for (220) diffraction peak of  $\text{Bi}_2\text{Na}_{0.63}\text{Ln}_{0.37}\text{Ta}_{1.75}\text{W}_{0.25}\text{O}_9$  ( $\text{Ln} = \text{La-Yb}$ ).

### BiNaLnTaWO nanosheet

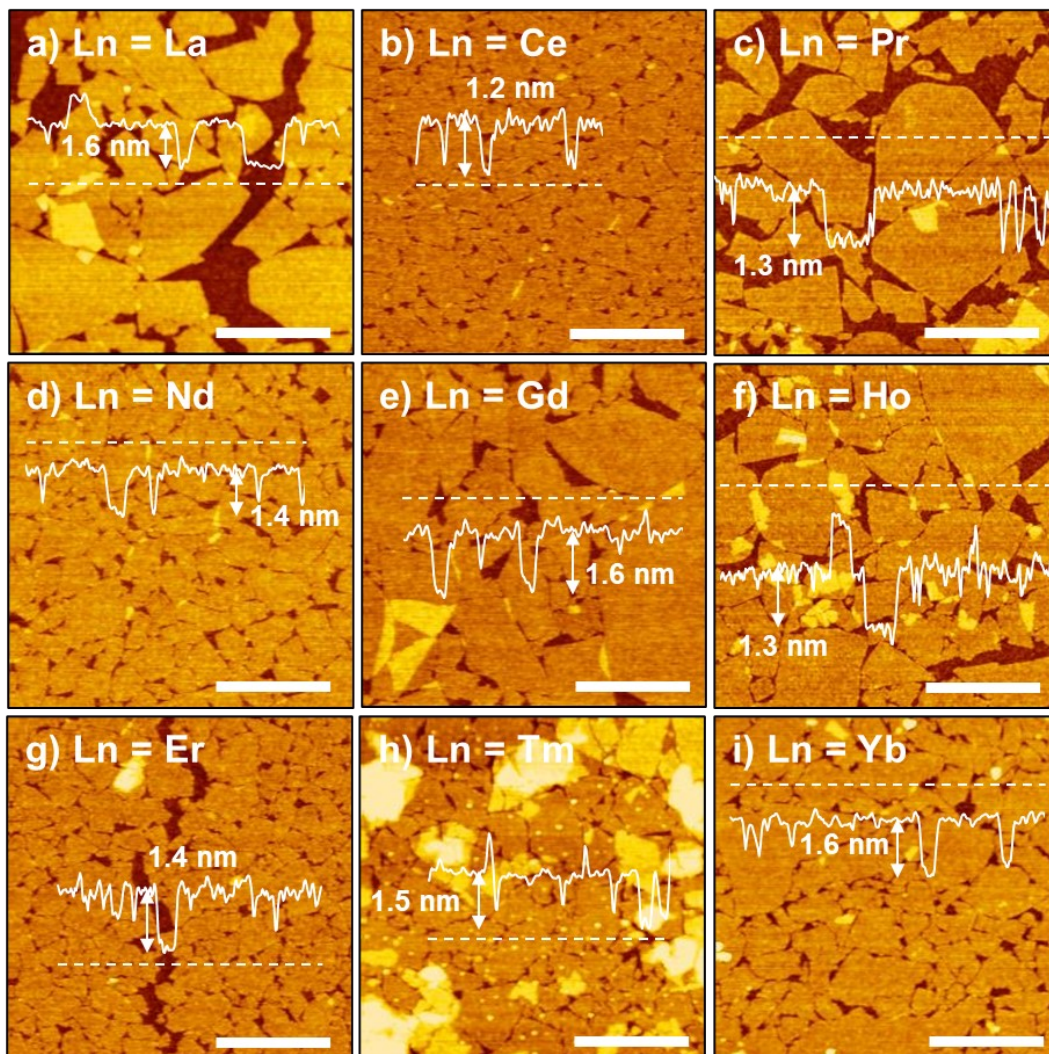

**Figure S3.** AFM images of BiNaLnTaWO nanosheet (Ln = (a) La, (b) Ce, (c) Pr, (d) Nd, (e) Gd, (f) Ho, (g) Er, (h) Tm, (i) Yb). Scale bar is 500 nm.

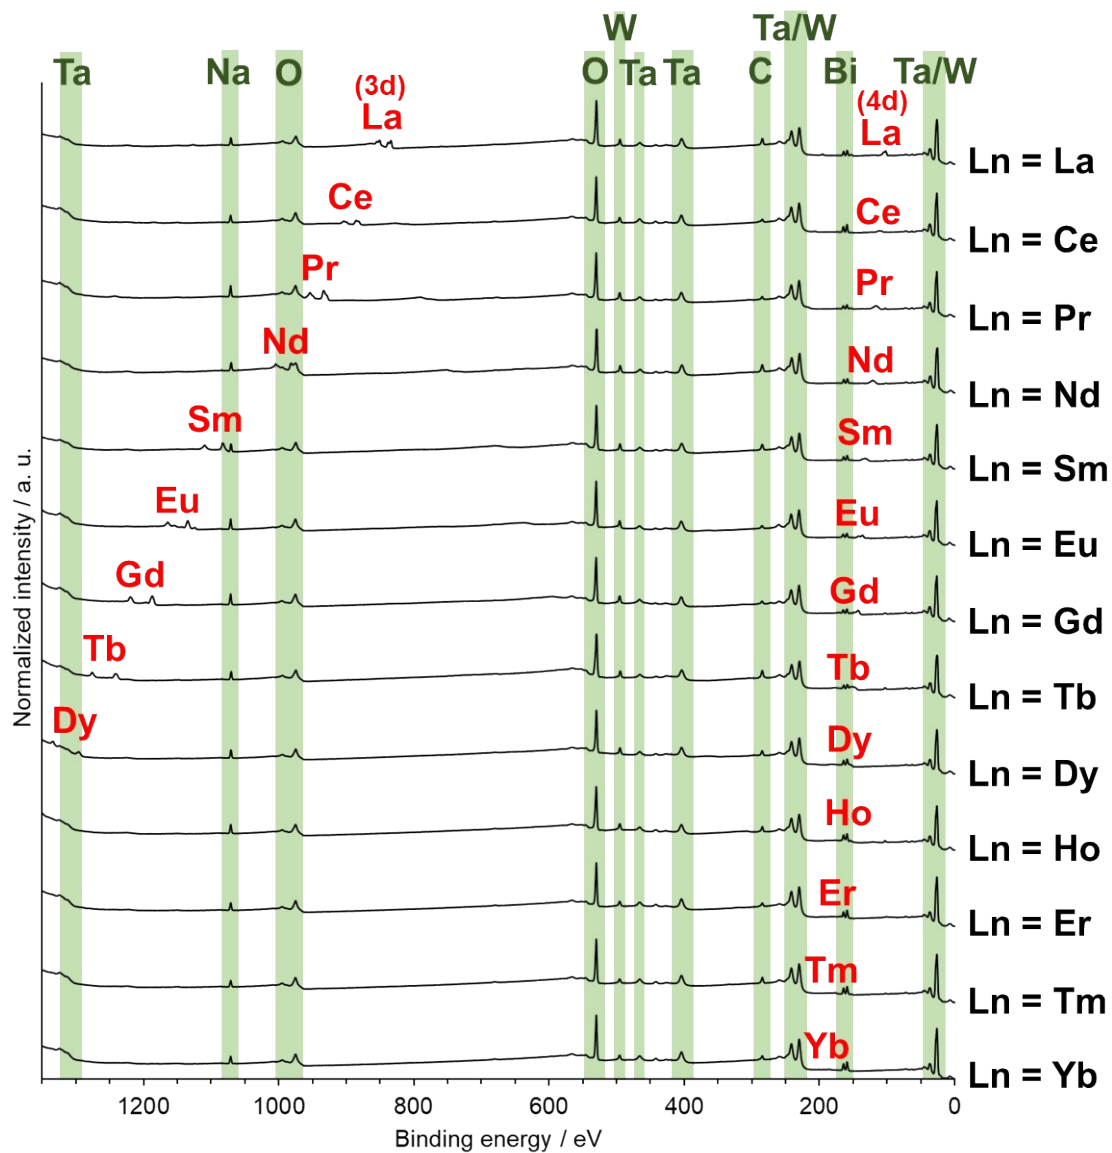

**Figure S4.** XPS survey scans (0-1350 eV) of BiNaLnTaWO nanosheet (Ln = La-Yb) spin-coating film on a quartz glass plate.

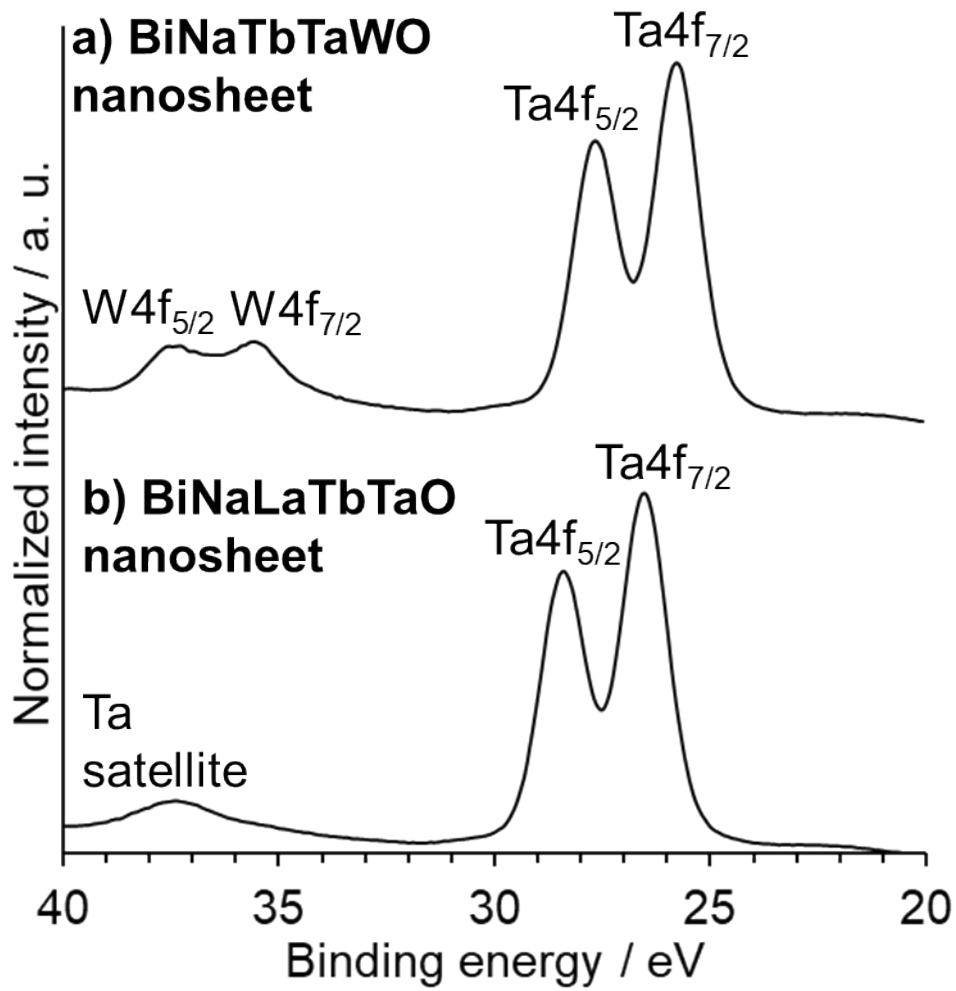

**Figure S5.** Ta 4f and W 4f XPS spectra of (a) BiNaTbTaWO and (b) BiNaLaTbTaO nanosheet spin-coating films on a quartz glass plate.

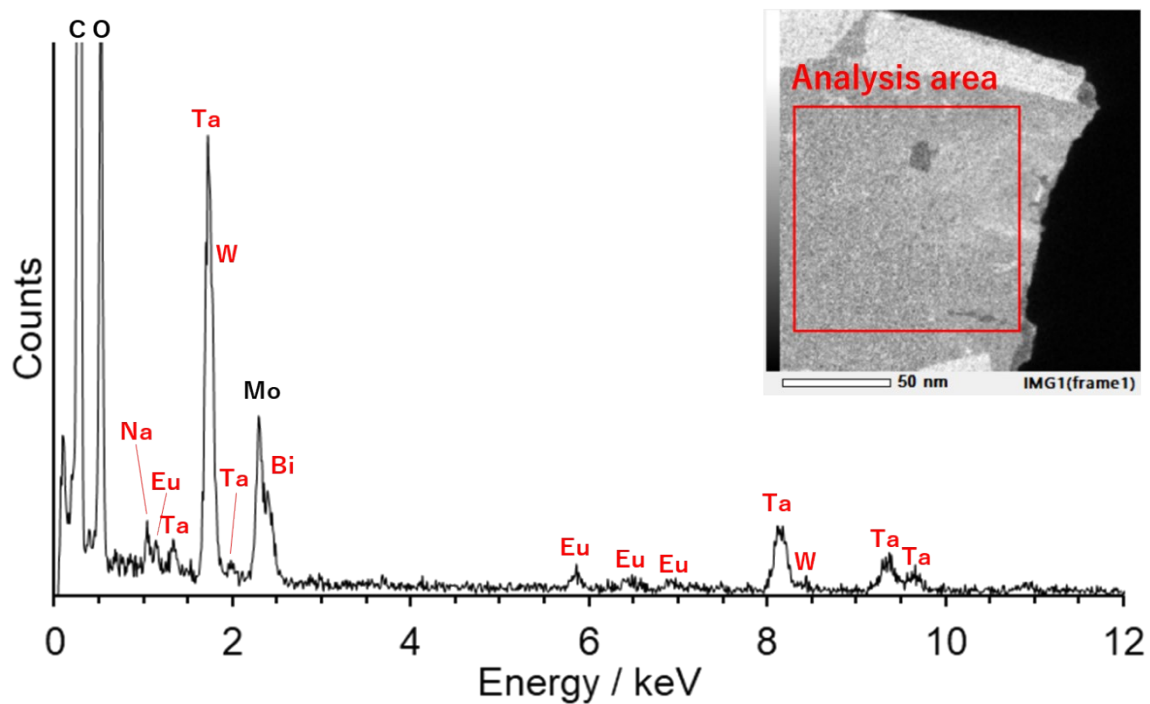

**Figure S6.** TEM-EDS spectra of BiNaEuTaWO nanosheet on a quantifoil Mo grid.

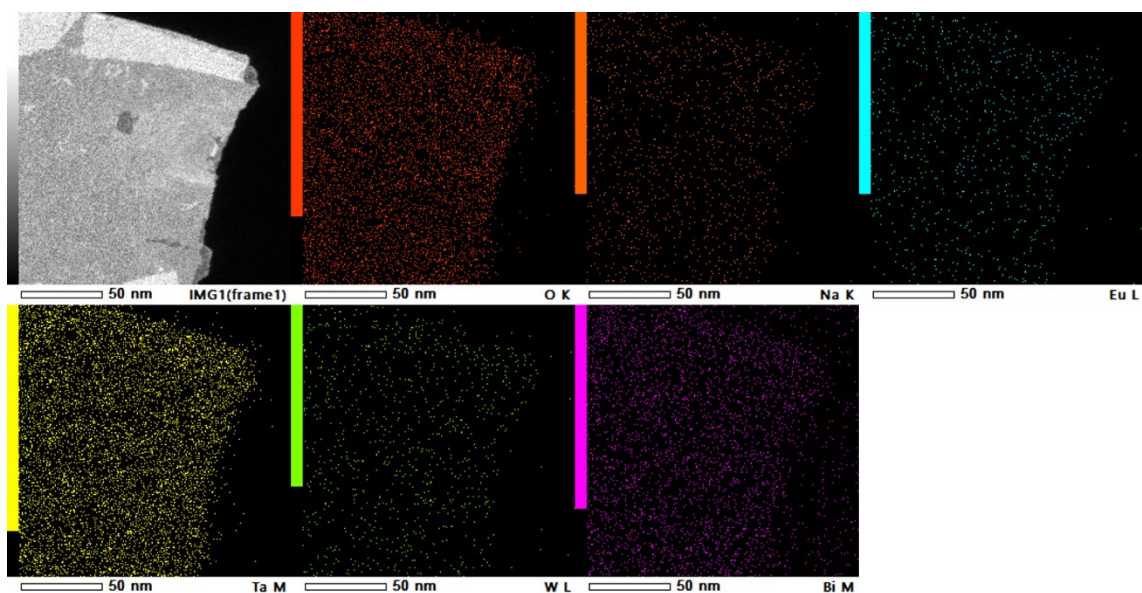

**Figure S7.** TEM-EDS mapping images of BiNaEuTaWO nanosheet on a quantifoil Mo grid.

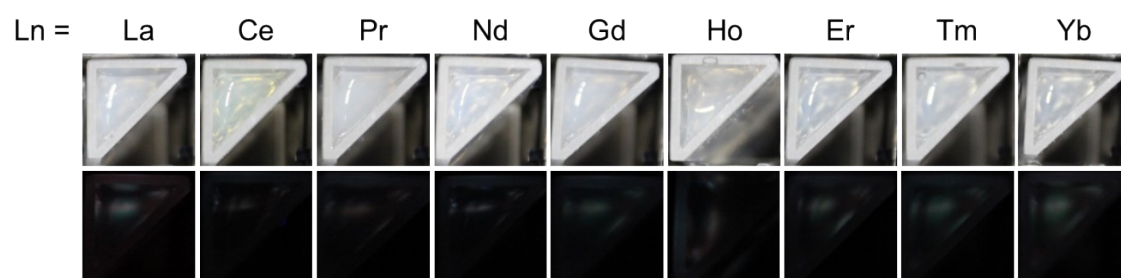

**Figure S8.** Photographs of BiNaLnTaWO nanosheet dispersing in 0.025 M TBAOH solution (Ln = La, Ce, Pr, Nd, Gd, Ho, Er, Tm, Yb;  $\lambda_{\text{ex.}} = 280 \text{ nm}$ ).

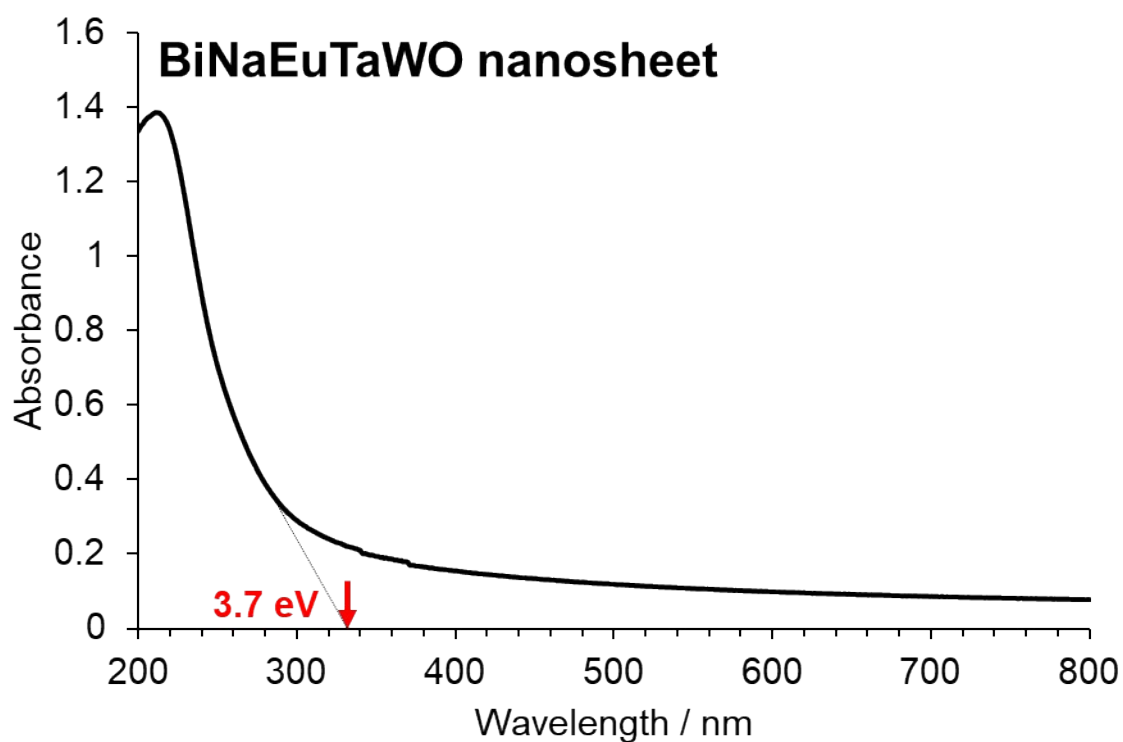

**Figure S9.** UV-Vis spectra of BiNaEuTaWO nanosheet spin-coating film on a quartz glass plate.



BiNaLnTaWO nanosheet

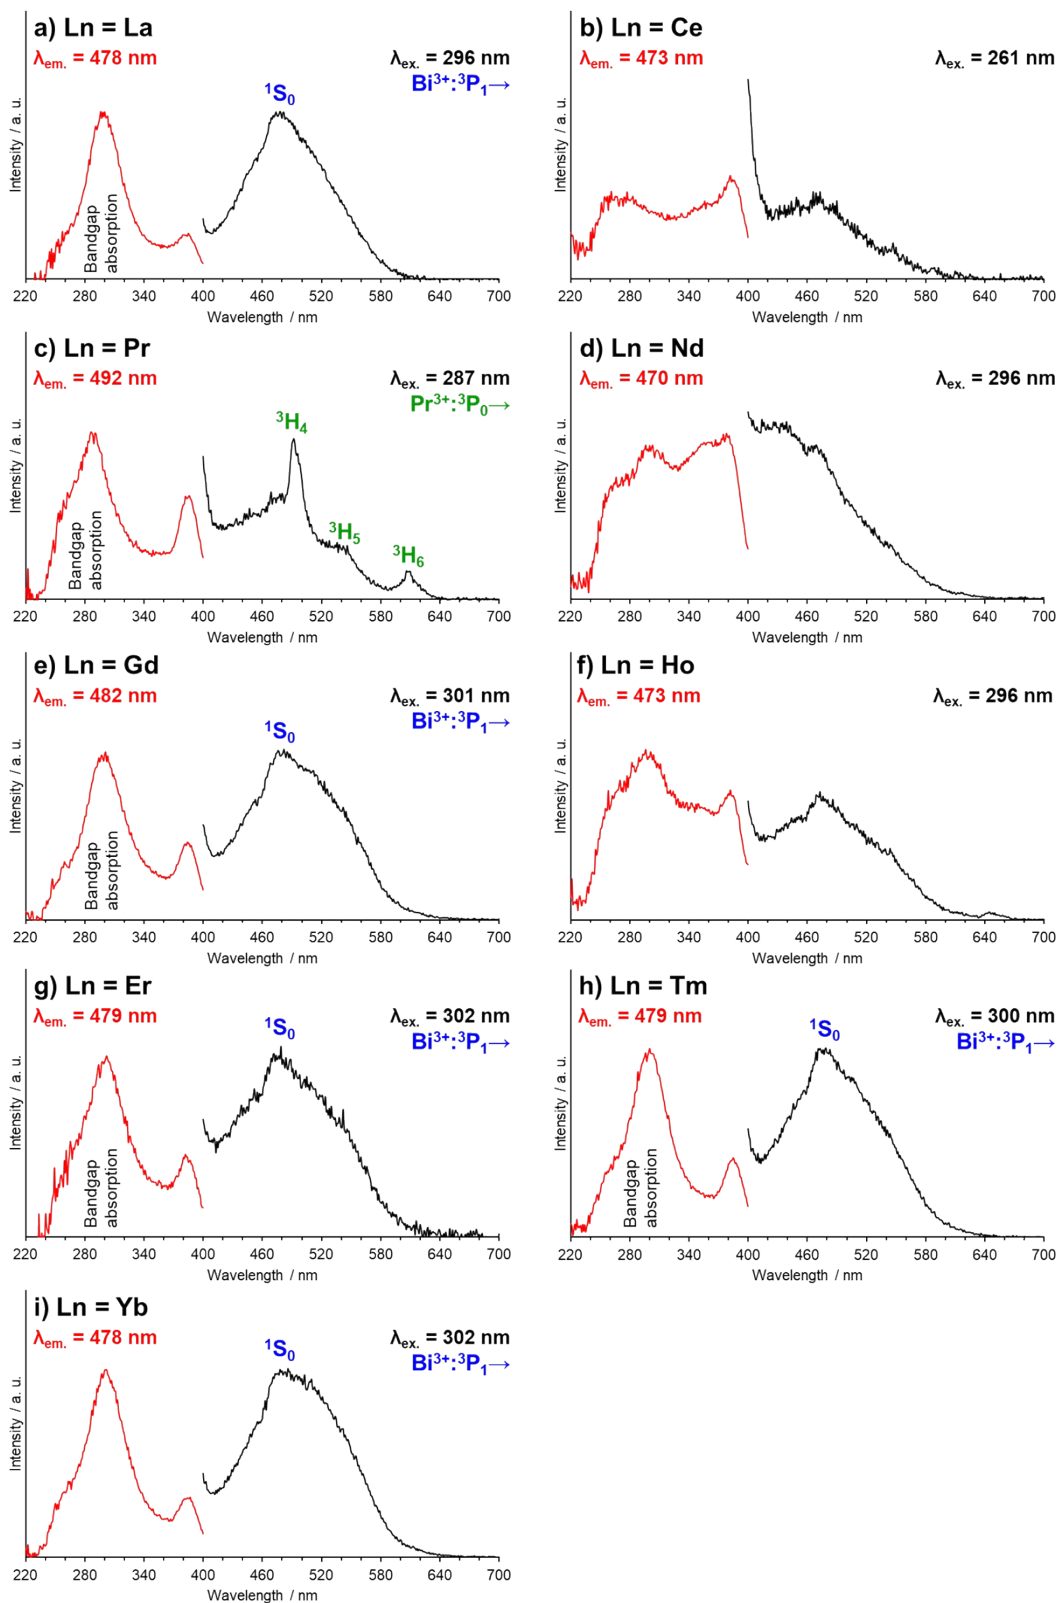

**Figure S10.** PL excitation and emission spectra of BiNaLnTaWO nanosheet dispersing in 0.025 M TBAOH solution (Ln = La, Ce, Pr, Nd, Gd, Ho, Er, Tm, Yb).

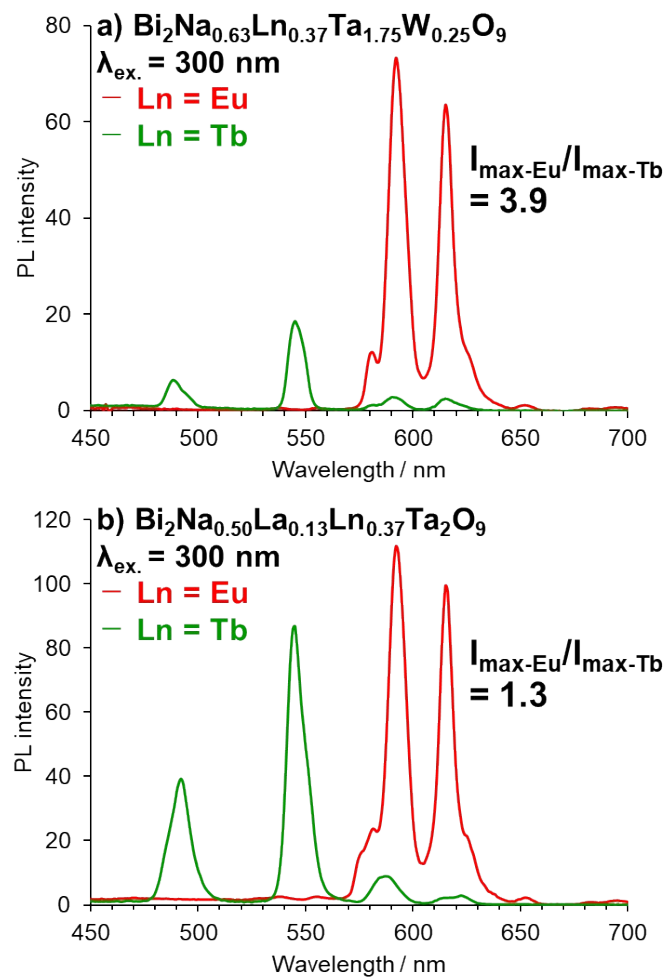

**Figure S11.** PL emission spectra ( $\lambda_{\text{ex}} = 300 \text{ nm}$ ) of  $\text{Bi}_2\text{Na}_{0.63}\text{Ln}_{0.37}\text{Ta}_{1.75}\text{W}_{0.25}\text{O}_9$  and  $\text{Bi}_2\text{Na}_{0.5}\text{La}_{0.13}\text{Ln}_{0.37}\text{Ta}_2\text{O}_9$ ; Ln = Eu or Tb)

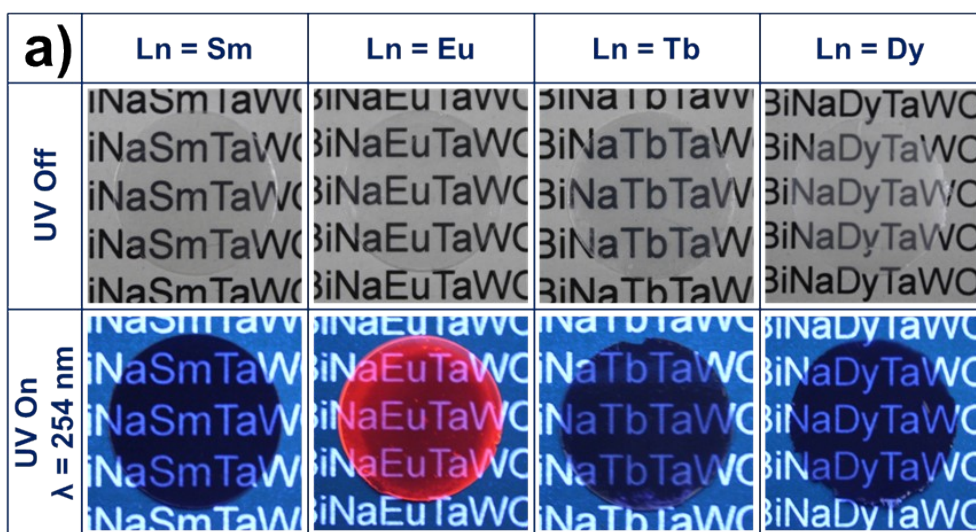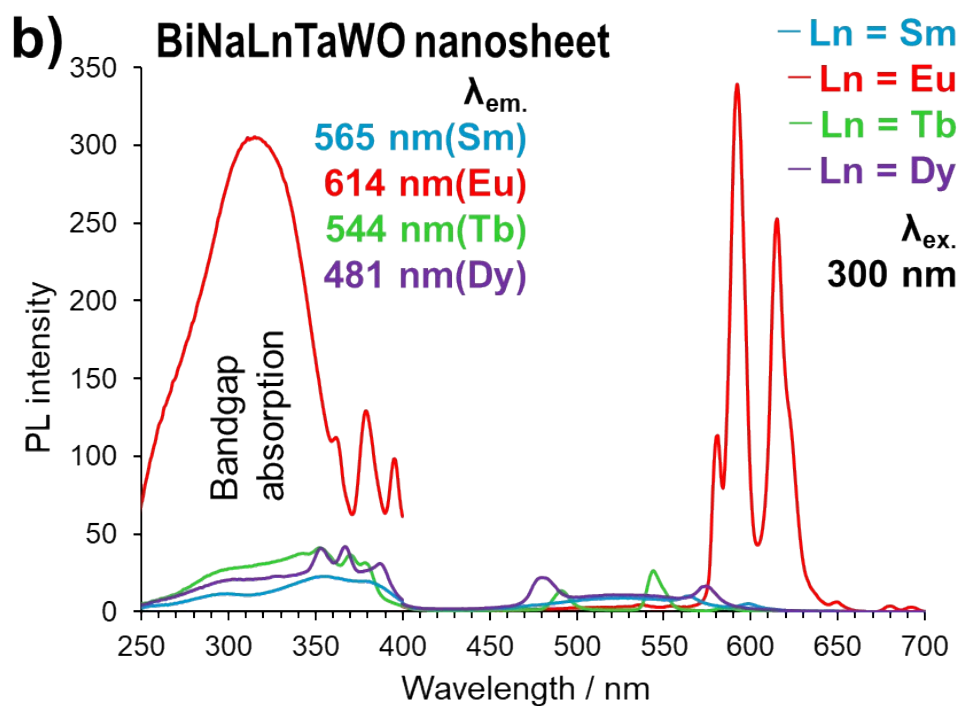

**Figure S12.** (a) Photographs of BiNaLnTaWO nanosheet free-standing films under UV-light illumination ( $\lambda_{ex.} = 254 \text{ nm}$ ; Ln = Sm, Eu, Tb, Dy). (b) PL excitation ( $\lambda_{em.} = 565 \text{ [Sm]}$ ;  $614 \text{ [Eu]}$ ;  $544 \text{ [Tb]}$ ;  $481 \text{ [Dy]}$ ) and emission ( $\lambda_{ex.} = 300 \text{ nm}$ ) spectra of BiNaLnTaWO nanosheet free-standing films.

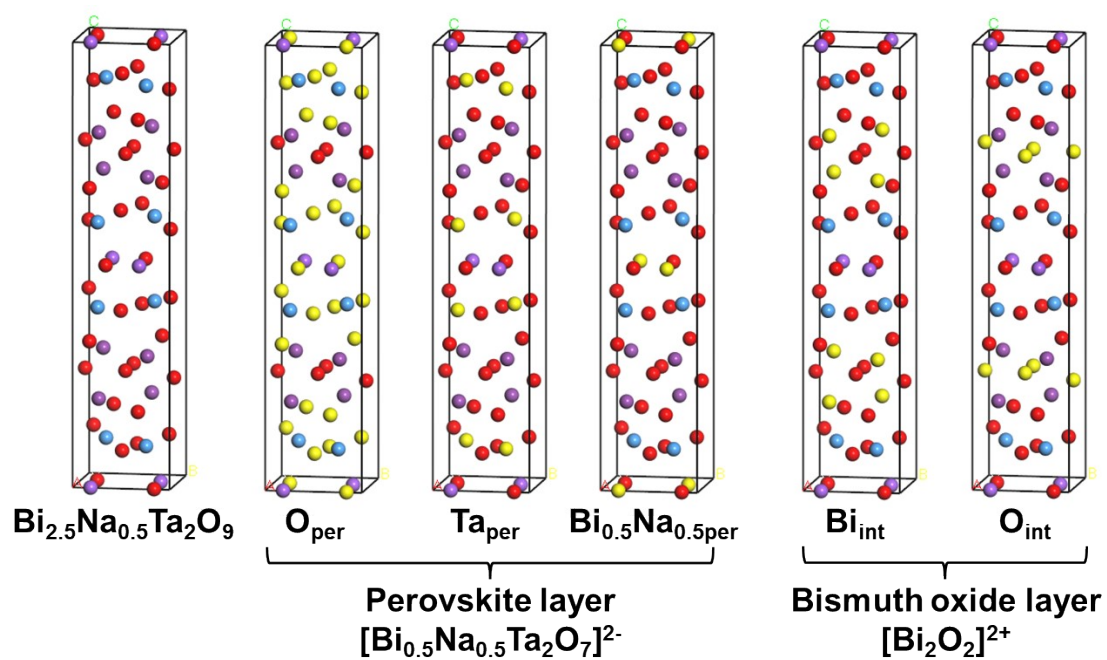

**Figure S13.** The unit cell of  $\text{Bi}_{2.5}\text{Na}_{0.5}\text{Ta}_2\text{O}_9$  after geometry optimization using DFT calculation with the plane wave codes CASTEP. The denotations, “ $\text{O}_{\text{per}}$ ”, “ $\text{Ta}_{\text{per}}$ ”, “ $\text{Bi}_{0.5}\text{Na}_{0.5\text{per}}$ ”, “ $\text{Bi}_{\text{int}}$ ”, “ $\text{O}_{\text{int}}$ ”, are corresponded to the yellow-colored atoms in the unit cell.

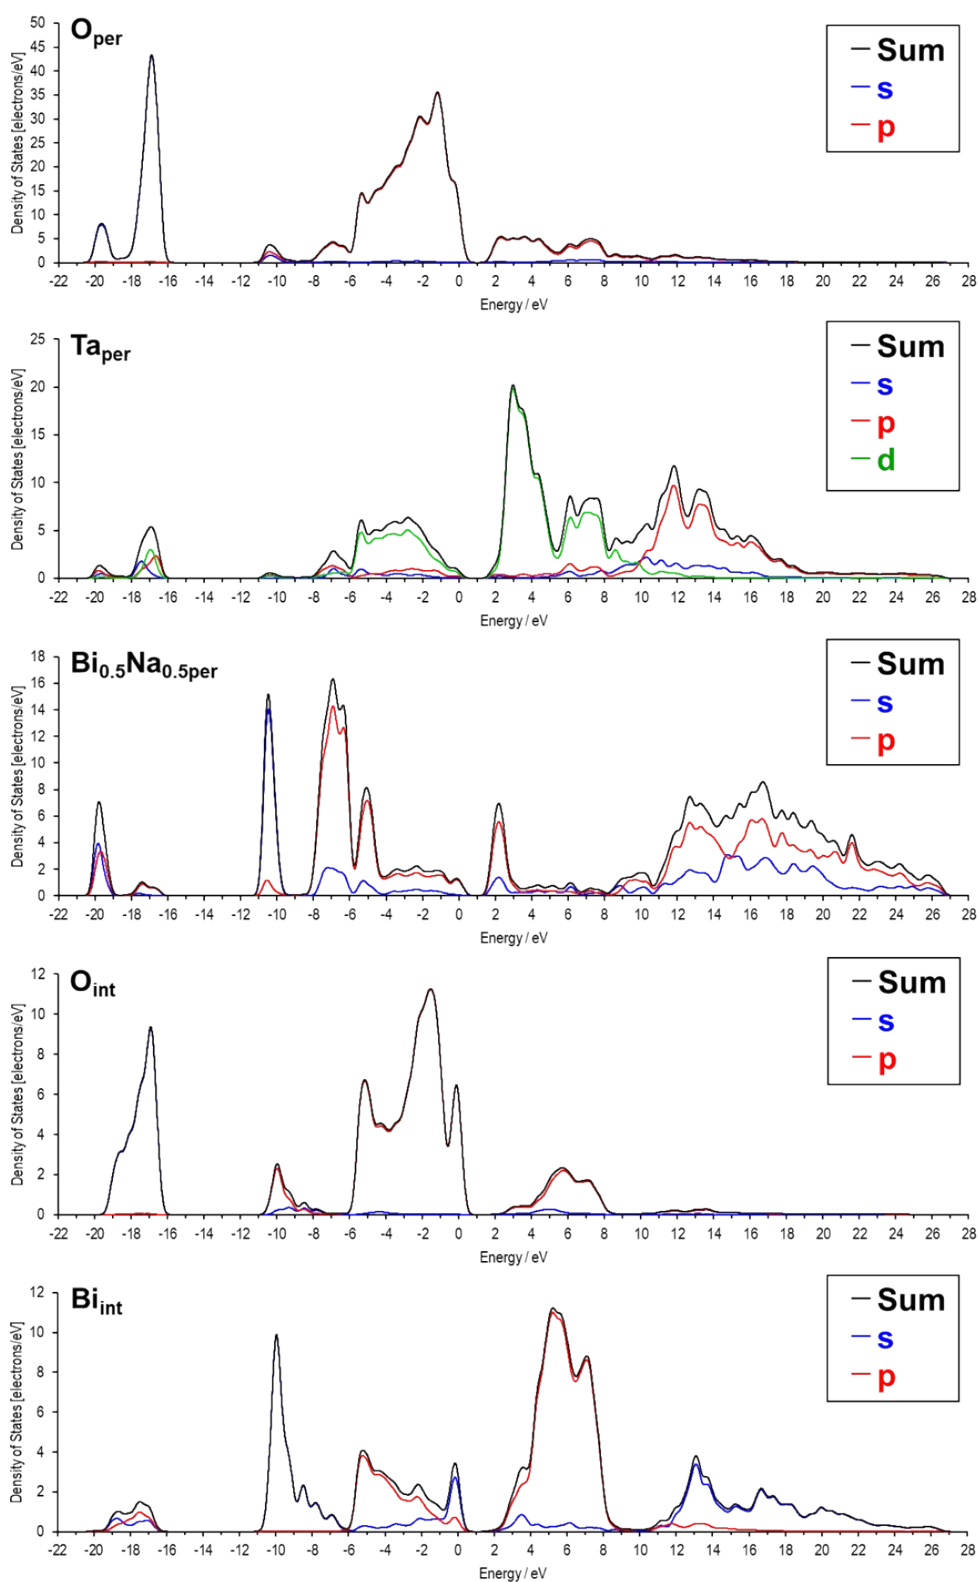

**Figure S14.** Partial density of states obtained from DFT calculation with the plane wave codes CASTEP. The denotations, “O<sub>per</sub>”, “Ta<sub>per</sub>”, “Bi<sub>0.5</sub>Na<sub>0.5per</sub>”, “Bi<sub>int</sub>”, “O<sub>int</sub>”, are corresponded to yellow-colored atoms in the unit cell of Bi<sub>2.5</sub>Na<sub>0.5</sub>Ta<sub>2</sub>O<sub>9</sub> in **Figure S11**.

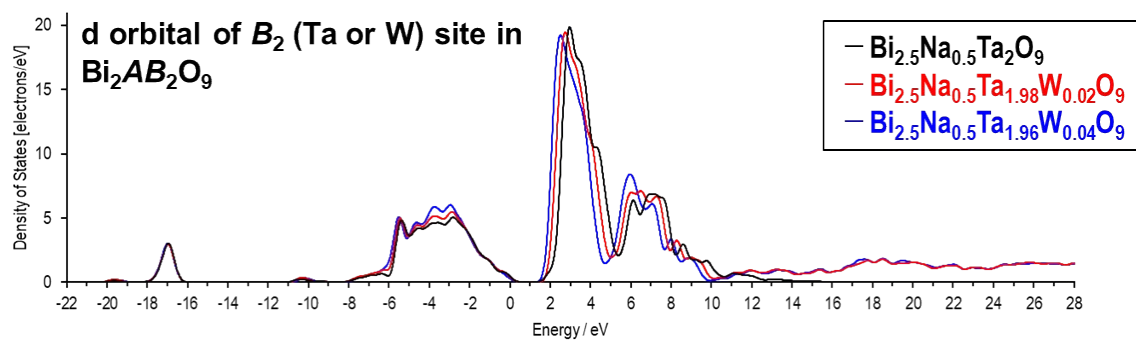

**Figure S15.** Partial density of states for d orbital of  $B_2$  sites ( $\text{Ta}_2$ ,  $\text{Ta}_{1.98}\text{W}_{0.02}$ ,  $\text{Ta}_{1.96}\text{W}_{0.04}$ ) of  $\text{Bi}_{2.5}\text{Na}_{0.5}\text{Ta}_2\text{O}_9$ ,  $\text{Bi}_{2.5}\text{Na}_{0.5}\text{Ta}_{1.98}\text{W}_{0.02}\text{O}_9$ , and  $\text{Bi}_{2.5}\text{Na}_{0.5}\text{Ta}_{1.96}\text{W}_{0.04}\text{O}_9$  obtained from DFT calculation with the plane wave codes CASTEP.

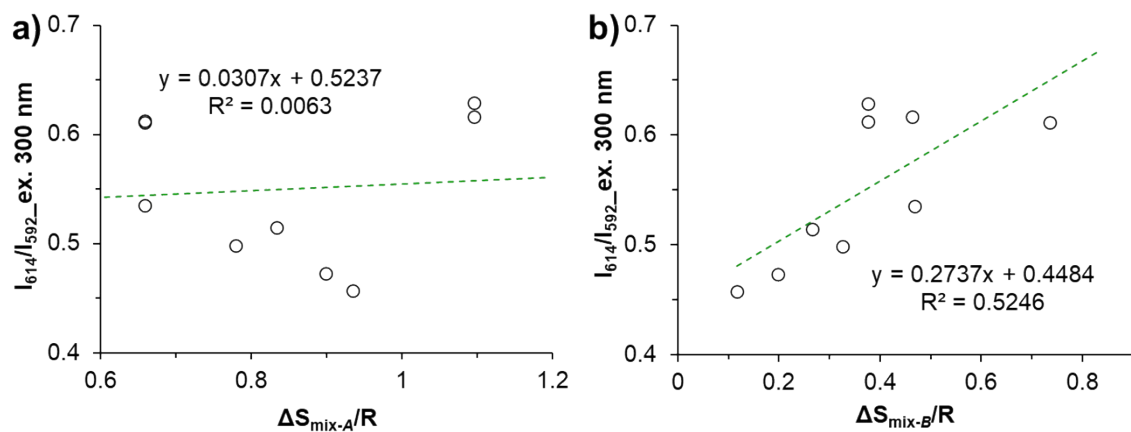

**Figure S16.** Relationship between structural entropy of the perovskite layer (A site:  $\Delta S_{mix-A}$ ; B site:  $\Delta S_{mix-B}$ ) of sample H1-H9 in Table 2 and PL emission ( $\lambda_{ex} = 300$  nm) intensity ratio at 614 nm ( $\text{Eu}^{3+}$ ,  ${}^5\text{D}_0 \rightarrow {}^7\text{F}_2$  transition) over 592 nm ( $\text{Eu}^{3+}$ ,  ${}^5\text{D}_0 \rightarrow {}^7\text{F}_1$  transition).

**Table S1.** Summary of the chemical compositions and PL properties of BiNaEuTaWO nanosheet in the present work and various perovskite nanosheets reported in the previous literatures.

| Chemical composition of perovskite nanosheet <sup>*a</sup> | Luminescent centre    | Quantum yield / % ( $\lambda_{ex.}$ ) | $I_{7F2}/I_{7F1}$ ratio (for $Eu^{3+}$ only) | Phase of the starting layered perovskite <sup>*b</sup> | Ref. No.  |
|------------------------------------------------------------|-----------------------|---------------------------------------|----------------------------------------------|--------------------------------------------------------|-----------|
| $Eu_{0.56}Ta_2O_7$                                         | $Eu^{3+}$             | -                                     | 1.0                                          | RP ( $Li_2A_{2/3}B_2O_7$ )                             | S1        |
| $Gd_{1.4}Eu_{0.6}Ti_3O_{10}$                               | $Eu^{3+}$             | 3.3 (245 nm)                          | 4.5                                          | RP ( $K_2A_2B_3O_{10}$ )                               | S2        |
| $Gd_{1.4}Tb_{0.6}Ti_3O_{10}$                               | $Tb^{3+*c}$           | -                                     | -                                            | RP ( $K_2A_2B_3O_{10}$ )                               |           |
| $La_{0.95}Eu_{0.05}Ta_2O_7$                                | $Eu^{3+}$             | -                                     | -                                            | DJ ( $RbAB_2O_7$ )                                     |           |
| $La_{0.7}Tb_{0.3}Ta_2O_7$                                  | $Tb^{3+}$             | 0.9 (230 nm)                          | -                                            | DJ ( $RbAB_2O_7$ )                                     | S3        |
| $La_{0.90}Eu_{0.05}Nb_2O_7$                                | $Eu^{3+}$             | -                                     | 3.8                                          | DJ ( $KAB_2O_7$ )                                      |           |
| $Ca_{1.9}Tb_{0.1}Ta_3O_{10}$                               | $Tb^{3+}$             | ~19 (270 nm)                          | -                                            | DJ ( $CsA_2B_3O_{10}$ )                                | S4        |
| $Bi_{0.16}Sr_{0.75}Ta_2O_7$                                | $Bi^{3+}$             | -                                     | -                                            | AU ( $Bi_2AB_2O_9$ )                                   | S5        |
| $Bi_{0.06}Ca_{0.64}Ta_2O_{7.5}$                            | $Bi^{3+}$             | -                                     | -                                            | AU ( $Bi_2AB_2O_9$ )                                   | S6        |
| $Bi_{0.05}Na_{0.34}Ta_2O_{7.5}$                            | $Bi^{3+}$             | -                                     | -                                            | AU ( $Bi_2AB_2O_9$ )                                   |           |
| $Bi_{0.11}La_{0.05}Na_{0.22}Ta_2O_{7.5}$                   | $Bi^{3+}$             | 0.05 (280 nm)                         | -                                            | AU ( $Bi_2AB_2O_9$ )                                   | S7        |
| $Bi_{0.11}Sm_{0.07}Na_{0.26}Ta_2O_{7.5}$                   | $Bi^{3+}$ & $Sm^{3+}$ | -                                     | -                                            | AU ( $Bi_2AB_2O_9$ )                                   |           |
| $Bi_{0.12}Eu_{0.06}Na_{0.20}Ta_2O_{7.5}$                   | $Bi^{3+}$ & $Eu^{3+}$ | -                                     | 0.6                                          | AU ( $Bi_2AB_2O_9$ )                                   |           |
| $Bi_{0.11}Tb_{0.07}Na_{0.23}Ta_2O_{7.5}$                   | $Bi^{3+}$ & $Tb^{3+}$ | -                                     | -                                            | AU ( $Bi_2AB_2O_9$ )                                   |           |
| $Bi_{0.10}Dy_{0.05}Na_{0.22}Ta_2O_{7.5}$                   | $Bi^{3+}$ & $Dy^{3+}$ | -                                     | -                                            | AU ( $Bi_2AB_2O_9$ )                                   |           |
| $Bi_{0.04}Na_{0.63}Eu_{0.32}Ta_{1.50}W_{0.09}O_{7.5}$      | $Eu^{3+}$             | 0.17 (310 nm)                         | 1.1                                          | AU ( $Bi_2AB_2O_9$ )                                   | This work |
| $Bi_{0.04}Na_{0.63}Tb_{0.34}Ta_{1.63}W_{0.09}O_{7.5}$      | $Tb^{3+*c}$           | -                                     | -                                            | AU ( $Bi_2AB_2O_9$ )                                   |           |

\*a) The total molar charge of each nanosheet is ignored for the chemical composition.

\*b) RP, DJ, and AU denote Ruddlesden-Popper, Dion-Jacobson, and Aurivillius phase layered perovskites, respectively.

\*c) The luminescent centre exhibited very weak or no observable emission.

## References

- S1) T. C. Ozawa, K. Fukuda, K. Akatsuka, Y. Ebina, T. Sasaki, K. Kurashima and K. Kosuda, *J. Phys. Chem. C*, 2008, **112**, 1312-1315.
- S2) S. Ida, C. Ogata, U. Unal, K. Izawa, T. Inoue, O. Altuntasoglu and Y. Matsumoto, *J. Am. Chem. Soc.*, 2007, **129**, 8956-8957.
- S3) T. C. Ozawa, K. Fukuda, K. Akatsuka, Y. Ebina and T. Sasaki, *Chem. Mater.*, 2007, **19**, 6575-6580.
- S4) S. Ida, S. Koga, T. Daio, H. Hagiwara, T. Ishihara, *Angew. Chem.* 2014, **126**, 13294-13298.



S5) S. Ida, C. Ogata, M. Eguchi, W. J. Youngblood, T. E. Mallouk and Y. Matsumoto, *J. Am. Chem. Soc.*, 2008, **130**, 7052-7059.

S6) K. Awaya and S. Ida, *Chem. Mater.*, 2023, **35**, 3713-3721.

S7) K. Awaya, K. Hatakeyama and S. Ida, *Adv. Opt. Mater.*, 2024, **12**, 2301228.
